# Supplementary material
Source: PubMed Central journal article supplement (PMC9887604)
Supplement: NIHMS1863717-supplement-Supplement_2.pdf [file NIHMS1863717-supplement-Supplement_2.pdf]

## Supplemental Appendix. Search Strategy

"child"[mh] OR "childhood"[All Fields] OR juvenile[All fields] AND "adult"[mh] OR "adult"[All Fields] OR adulthood[All Fields]

AND

"childhood determinants"[All Fields] OR "childhood onset"[All Fields] OR "adult outcome\*"[All Fields] OR "early onset"[All Fields] OR "developmental trajectory"[All fields] OR "childhood psychiatric"[All Fields] OR "child psychiatric"[All Fields] OR "child mental"[All Fields] OR persist[All Fields] OR persisted[All Fields] OR predictors[All Fields] OR predictor[All Fields] OR predicted[tw] OR predict[All Fields] OR "etiology"[Subheading] OR "etiology"[All Fields] OR "causality"[All Fields] OR "causality"[MeSH Terms] OR predictive[All Fields] OR "risk"[MeSH Terms] OR "risk"[All Fields]

AND

"prospective studies"[All Fields] OR prospective[tw] OR prospectively[tw] OR longitudinal[tw] OR "longitudinal studies"[All Fields] OR "follow up studies"[All Fields] OR "birth cohort"[All fields] OR "cohort studies"[mh] NOT "retrospective studies"[mh]

NOT

"editorial"[Publication Type] OR "interview"[Publication Type] OR "legislation"[Publication Type] OR "letter"[Publication Type] OR "news"[Publication Type] OR "newspaper article"[Publication Type] OR "patient education handout"[Publication Type] OR "consensus development conference"[Publication Type] OR "consensus development conference, nih"[Publication Type] OR "practice guideline"[Publication Type] OR "review"[publication type]

AND

"phobic"[All Fields] OR "phobic disorders"[All Fields] OR "phobia"[All Fields] OR "phobic disorders"[MeSH Terms]

OR "Obsessive-Compulsive Disorder"[mh] OR "obsessive compulsive"[All Fields] OR obsessive-compulsive [All fields] OR OCD [All Fields]

OR "tic disorders"[MeSH Terms] OR "tic"[All Fields] AND "disorders"[All Fields] OR "tic disorders"[All Fields] OR "tic"[All Fields] AND "disorder"[All Fields] OR "tic disorder"[All Fields] OR "tic disorders"[MeSH Terms] OR "tic"[All Fields] AND "disorders"[All Fields] OR "tic disorders"[All Fields]

OR "Child Behavior Disorders"[mh] OR "Anxiety Disorders"[mh] OR "anxiety"[MeSH Terms] OR "anxiety"[All Fields]

OR "depressive disorder"[MeSH Terms] OR "depressive"[All Fields] AND "disorder"[All Fields] OR "depressive disorder"[All Fields] OR "depression"[All Fields] OR "depression"[MeSH Terms] OR "major depressive disorder"[All Fields] OR depressed[tw]

OR "Attention Deficit and Disruptive Behavior Disorders"[Mesh] OR "attention"[All Fields] AND "deficit"[All Fields] AND "disorder"[All Fields] OR "adhd"[All Fields] OR "conduct disorder"[All fields] OR "oppositional defiant disorder"[All Fields]

NOT "cognition disorders"[mh] OR "neoplasms"[mh] OR "Cancer Survivors"[mh] OR bipolar[all fields] OR "autistic disorder"[MeSH Terms] OR "autistic"[All Fields] AND "disorder"[All Fields] OR "autistic disorder"[All Fields] OR "autism"[All Fields] OR ASD[all fields]

AND

English[lang] AND "2000/01/01"[PDAT]: "2019/11/01"[PDAT]
