# Supplementary material
Source: PubMed Central journal article supplement (PMC9887604)
Supplement: NIHMS1863717-supplement-Supplement_3.pdf [file NIHMS1863717-supplement-Supplement_3.pdf]

**Supplemental Table 1. Characteristics of Included Studies**

| <b>Author, Year<br/>[Country]</b>                            | <b>Cohort Type<br/>[Article Cohort]</b>                   | <b>Sample Size: Eligible and Analysis<br/>[% female]</b> | <b>Age at<br/>Entry</b> | <b>Age at Follow-<br/>up</b> |
|--------------------------------------------------------------|-----------------------------------------------------------|----------------------------------------------------------|-------------------------|------------------------------|
| Wickramaratne et al. (2000) <sup>20</sup><br>[United States] | [High/Low Risk Family Cohort]                             | Eligible n = 182; Analysis n = 168<br>[54% female]       | 6-12                    | 20-38                        |
| Canals et al. (2002) <sup>21</sup><br>[Spain]                | Elementary School Cohort<br>[Schoolchildren in Catalonia] | Eligible n = 534; Analysis n = 199 [49.7%<br>female]     | 11-12                   | 18                           |
| Haavisto et al. (2004) <sup>22</sup><br>[Finland]            | Birth Cohort<br>[From Boy to Man Cohort]                  | Eligible n = 2946; Analysis n = 2348 [0%<br>female]      | 8                       | 18                           |
| Sourander et al. (2005) <sup>17</sup><br>[Finland]           | Birth Cohort<br>[From Boy to Man Cohort]                  | Eligible n = 2946; Analysis n = 2712 [0%<br>female]      | 8                       | 18                           |
| Clark et al. (2007) <sup>23</sup><br>[United Kingdom]        | Birth Cohort<br>[1958 British Birth Cohort]               | Eligible n = 17365; Analysis n = 16336<br>[NR]           | 7, 11                   | 33, 45                       |
| Stansfeld et al. (2008) <sup>24</sup><br>[United Kingdom]    | Birth Cohort<br>[1958 British Birth Cohort]               | Eligible n = 15893 Analysis n = 8243<br>[48.1% female]   | 7, 11                   | 45                           |
| Multimaki et al. (2008) <sup>25</sup><br>[Finland]           | Birth Cohort<br>[From Boy to Man Cohort]                  | Eligible n = 2946 Analysis n = 2622<br>[0% female]       | 8                       | 18                           |
| Niemela et al. (2009) <sup>26</sup><br>[Finland]             | Birth Cohort<br>[From Boy to Man Cohort]                  | Eligible n = 2946 Analysis n = 2307 [0%<br>female]       | 8                       | 18                           |
| Goodwin et al. (2009) <sup>27</sup> [Finland]                | Birth Cohort<br>[From Boy to Man Cohort]                  | Eligible n = 2946 Analysis n = 2136<br>[0% female]       | 8                       | 18-23                        |
| Copeland, et al. (2009) <sup>28</sup><br>[United States]     | Childhood Cohort<br>[Great Smoky Mountains Study]         | Eligible n = 3896; Analysis n = 838 [NR]                 | 9-12                    | 19, 21                       |
| Bureau et al. (2009) <sup>29</sup><br>[United States]        | High/Low Risk Family Cohort                               | Eligible n = 79 Analysis n = 47<br>[48.9% female]        | 7-8                     | 19                           |

**Supplemental Table 1. Characteristics of Included Studies**

| <b>Author, Year<br/>[Country]</b>                           | <b>Cohort Type<br/>[Article Cohort]</b>                                                              | <b>Sample Size: Eligible and Analysis<br/>[% female]</b> | <b>Age at<br/>Entry</b> | <b>Age at Follow-<br/>up</b> |
|-------------------------------------------------------------|------------------------------------------------------------------------------------------------------|----------------------------------------------------------|-------------------------|------------------------------|
| Kosterman et al. (2009) <sup>30</sup><br>[United States]    | Elementary School Cohort<br>[Seattle Social Development<br>Project]                                  | Eligible n = 808 Analysis n = 765<br>[49.9% female]      | 10-11                   | 21                           |
| McClure et al. (2012) <sup>31</sup><br>[United States]      | Elementary School Cohort<br>[12 schools, Pacific Northwest]                                          | Eligible n = 655 Analysis n = 510<br>[51% female]        | 9-10                    | 24-26                        |
| Fischer et al. (2012) <sup>31</sup><br>[Australia]          | Birth Cohort<br>[Mater Misericordiae Hospital and<br>University of Queensland Study of<br>Pregnancy] | Eligible n = 5288 Analysis n = 3803 [51%<br>female]      | 5                       | 21                           |
| Korczak et al. (2014) <sup>32</sup><br>[Canada]             | Childhood Cohort<br>[Ontario Child Health Survey]                                                    | Eligible n = 1992; Analysis n = 1147<br>[48.5% female]   | 4-11                    | 21-28                        |
| Goldman-Mellor et al. (2014) <sup>33</sup><br>[New Zealand] | Birth Cohort<br>[Dunedin Study]                                                                      | Eligible n = 1007; Analysis n = 949<br>[49.7% female]    | 5-11                    | 38                           |
| Zohsel et al. (2016) <sup>34</sup><br>[Germany]             | High Risk Childhood Cohort<br>[Mannheim Study of Children at<br>Risk]                                | Eligible n = 366; Analysis n = 307<br>[67% female]       | 4.5, 8, 11              | 25                           |
