# Supplementary material
Source: PubMed Central journal article supplement (PMC9887604)

Supplemental Figure 1. PRISMA Flow Diagram of Search Strategy

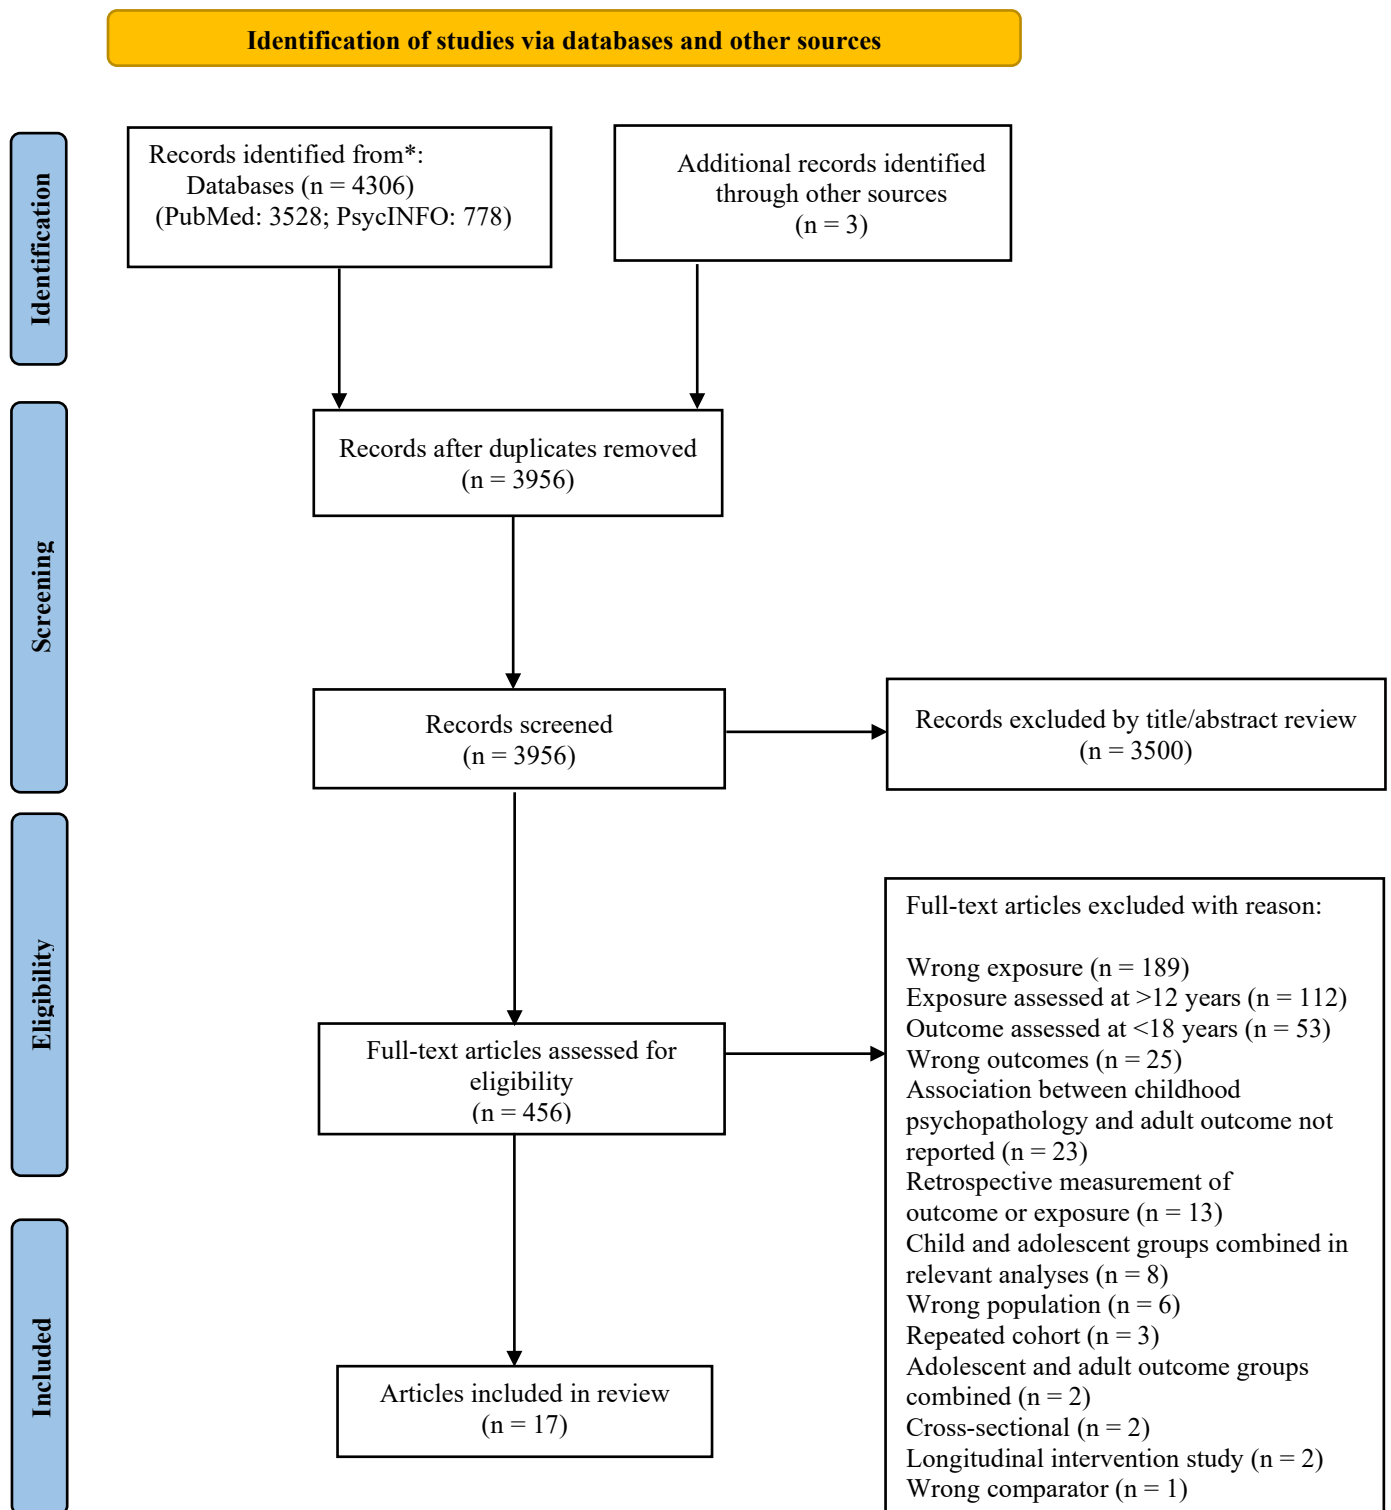

Supplement: NIHMS1863717-supplement-Supplement_1.pdf [file NIHMS1863717-supplement-Supplement_1.pdf]
